# Supplementary material for: Single nucleotide polymorphisms to discriminate different classes of hybrid between wild Atlantic salmon and aquaculture escapees
Source: PubMed Central journal article supplement (PMC4999531; doi:10.1111/eva.12407), 2016-08-18

**SNPs to discriminate different classes of hybrid between wild Atlantic salmon and aquaculture escapees: Supplementary Figures.**

**Figure S1:** Relationship between true B allele frequency obtained through individual genotyping, and B allele frequency estimated by allelotyping, for the four New Teno Mainstem pools. Top: raw estimated frequencies before PPC correction, 199,297 SNPs; middle: estimated frequencies following PPC correction, 199,297 SNPs; bottom: 200 SNPs used for hybrid discrimination.

**Figure S1**

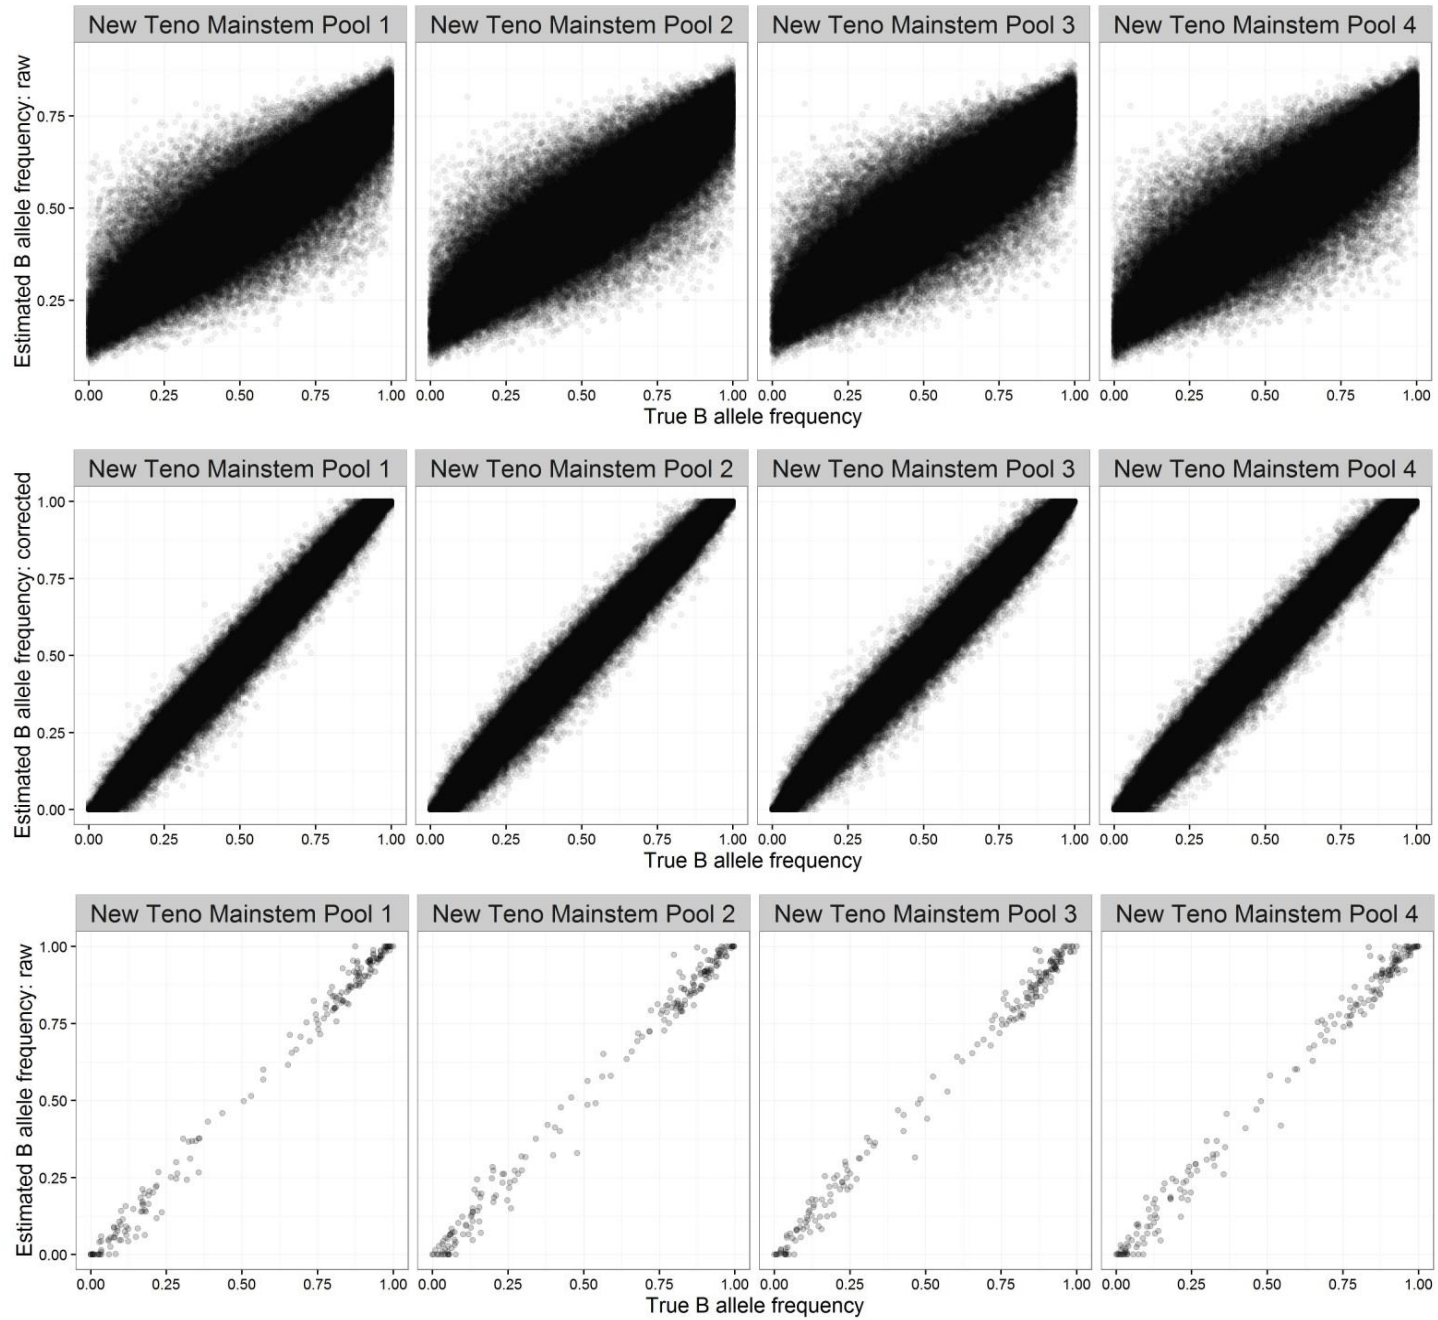

Supplement: EVA-9-1017-s001.pdf [file EVA-9-1017-s001.pdf]
